# Supplementary material for: Horizontal Ridge Augmentation: A Comparison between Khoury and Urban Technique
Source: MDPI journal article supplement (doi:10.3390/biology10080749), 2021-08-05
Supplement: s1 [file s1]

### Supplementary Material:

| First author and year of publication | Reason for exclusion                     |
|--------------------------------------|------------------------------------------|
| Acocella A et al. 2010               | Onlay block graft                        |
| Alérico FA et al. 2019               | Unclear measurement methodology          |
| Amorfini L et al. 2014               | Simultaneous implant placement           |
| Cordaro L et al. 2011                | Onlay block graft                        |
| D'Amato S et al. 2015                | Insufficient sample size                 |
| De Stavola L et al. 2013             | Vertical bone augmentation               |
| Ersanli S et al. 2004                | Use of other biomaterials                |
| Ersanli S et al. 2016                | Use of other biomaterials                |
| Gulinelli JL et al. 2017             | Onlay block graft                        |
| Holtzclaw DJ et al. 2010             | Split-ridge technique                    |
| Jung RE et al. 2009                  | Simultaneous implant placement           |
| Khoury F et al. 2019                 | Vertical bone augmentation               |
| Korsch M et al. 2019                 | Use of other biomaterials                |
| Korzh DG et al. 2019                 | Full-Text not accessible                 |
| Moukrioti J et al. 2019              | Unclear measurement methodology          |
| Meloni SM et al. 2017                | Sample studied reported in another study |
| Novy LFS et al. 2019                 | Vertical bone augmentation               |
| Peñarrocha-Diago M et al. 2013       | Use of other biomaterials                |
| Restoy-Lozano A et al. 2015          | Vertical bone augmentation               |
| Santana RB et al. 2015               | Onlay block graft                        |
| Schlee M et al. 2014                 | Use of other biomaterials                |
| Schwartz-Arad D et al. 2005          | Onlay block graft                        |
| Spin-Neto R et al. 2014              | Onlay block graft                        |
| Spin-Neto R et al. 2013              | Onlay block graft                        |
| Spin-Neto R et al. 2015              | Onlay block graft                        |
| Spin-Neto R et al. 2013              | Onlay block graft                        |
| Thoma DS et al. 2018                 | Use of other biomaterials                |
| Thoma DS et al. 2019                 | Use of other biomaterials                |

---

|                       |                           |
|-----------------------|---------------------------|
| Urban IA et al. 2011  | Use of other biomaterials |
| Urban IA et al. 2017  | Use of other biomaterials |
| Verdugo F et al. 2011 | Onlay block graft         |
| Verdugo F et al. 2012 | Onlay block graft         |

---

**Table S1 .** List of excluded articles and reason for exclusion.

| Authors          | Year | Study design   | Random generation of the sequence | Allocation concealment | Blinding of participants and staff | Blinding of evaluator | Incomplete data | Selective notification of results | Another bias   |
|------------------|------|----------------|-----------------------------------|------------------------|------------------------------------|-----------------------|-----------------|-----------------------------------|----------------|
| Bartols A et al. | 2018 | Clinical trial | Low risk                          | Low risk               | Low risk                           | Low risk              | Low risk        | Low risk                          | Low risk       |
| Atef et al       | 2019 | Clinical trial | Low risk                          | Not clear risk         | Not clear risk                     | Not clear risk        | Low risk        | Low risk                          | Not clear risk |
| Atef M et al.    | 2020 | Clinical trial | Low risk                          | Not clear risk         | Not clear risk                     | Not clear risk        | Low risk        | Low risk                          | Not clear risk |

**Table S2.** Cochrane Risk of bias of clinical trials.

| Authors            | Year | Study design | Clear inclusion criteria | Standard and reliable condition measure | Correct condition identification | Consecutive inclusion of participants | Complete inclusion of participants | Complete demographic information | Clinical information | Clear follow up outcomes | Clear reporting of the demographic information of sites/clinic | Statistical analysis appropriate |
|--------------------|------|--------------|--------------------------|-----------------------------------------|----------------------------------|---------------------------------------|------------------------------------|----------------------------------|----------------------|--------------------------|----------------------------------------------------------------|----------------------------------|
| Saravanan P et al. | 2013 | Case series  | Yes                      | Yes                                     | Yes                              | Not clear                             | Yes                                | Not clear                        | Yes                  | Not clear                | Not clear                                                      | Yes                              |
| Urban IA et al.    | 2013 | Case series  | Yes                      | Yes                                     | Yes                              | Not clear                             | Yes                                | Yes                              | Yes                  | Yes                      | Yes                                                            | Yes                              |
| Meloni SM et al.   | 2019 | Case Series  | Yes                      | Yes                                     | Yes                              | Yes                                   | Yes                                | Yes                              | Yes                  | Yes                      | Yes                                                            | Yes                              |

**Table S3.** Joanna Briggs Risk of bias of case series.
